# Supplementary material for: Solution synthesis of core–shell Co9S8@MoS2 catalysts
Source: Royal Society of Chemistry journal article supplement (doi:10.1039/c6cy00311g), 2016-01-01
Supplement: c6cy00311g1.pdf [file c6cy00311g1.pdf]

## Solution synthesis of core-shell $\text{Co}_9\text{S}_8@\text{MoS}_2$ catalysts

A. Hadj-Aïssa, F. Dassenoy, C. Geantet, P. Afanasiev.

### SIPPLEMENTARY INFORMATION

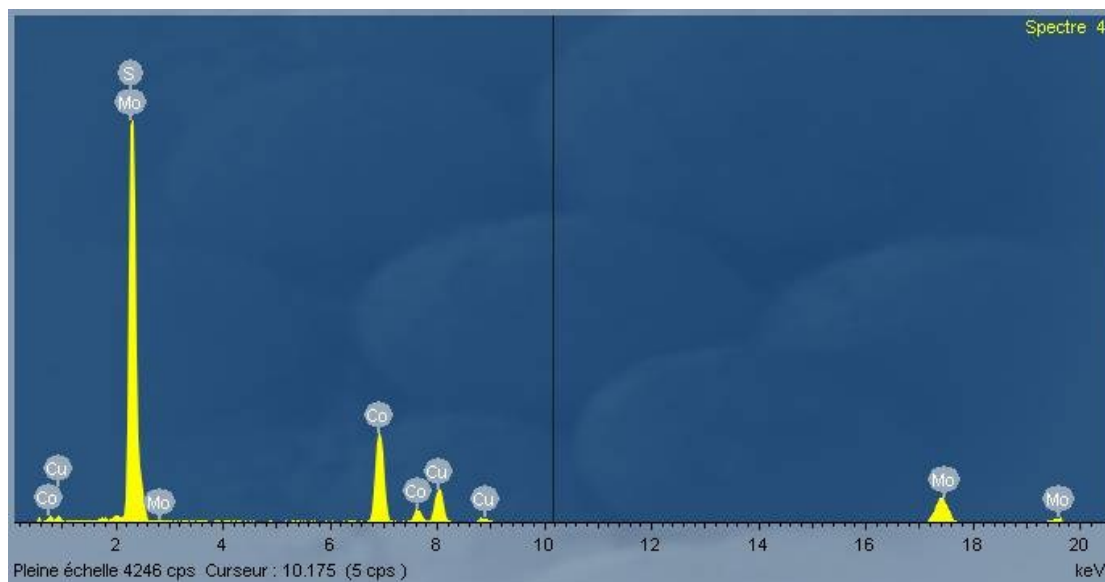

(a)

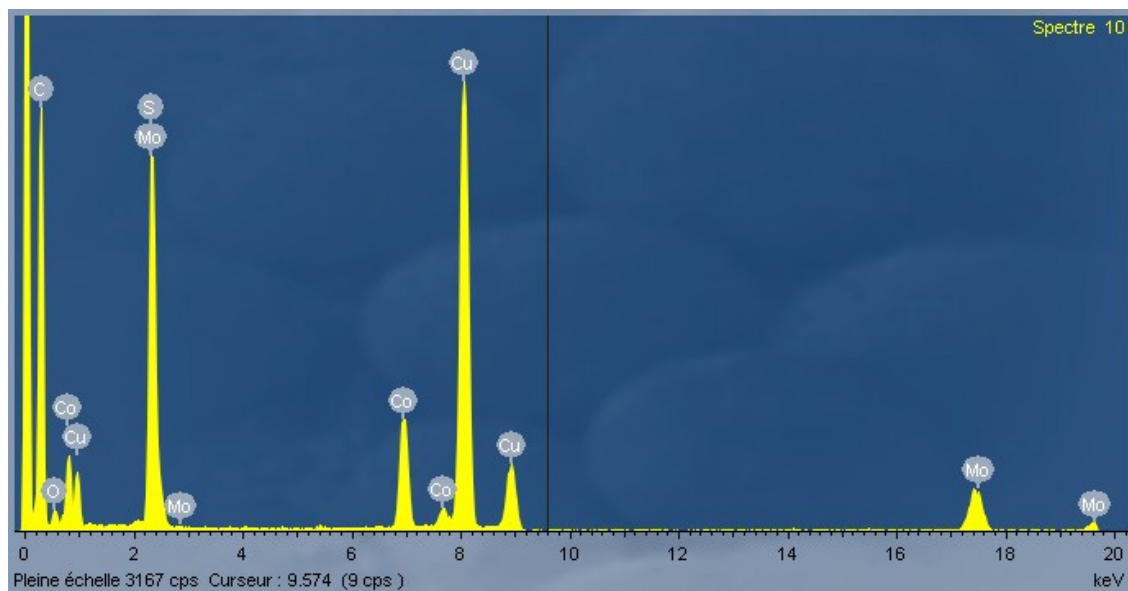

(b)

Figure S1. EDS spectra of the solids CoMoS-init (a) and CoMoS-350 (b). Cu signal comes from the sample holder grid.

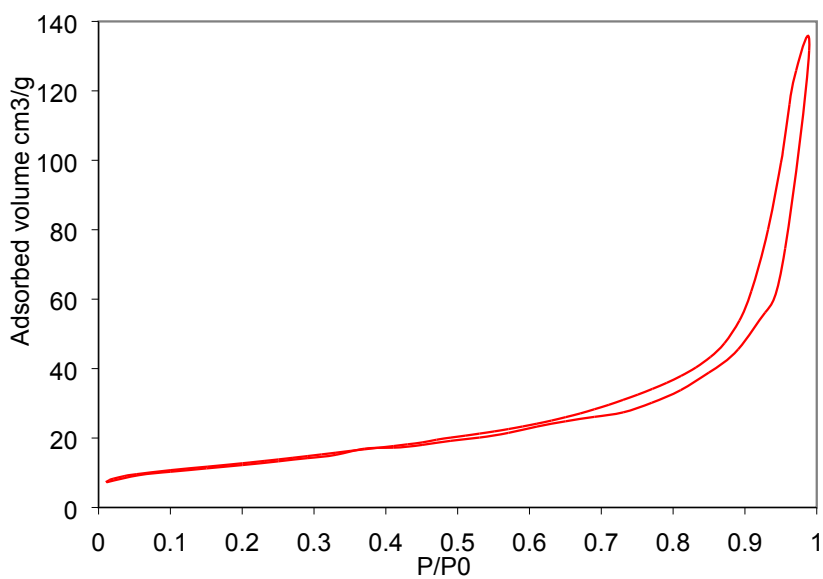

(a)

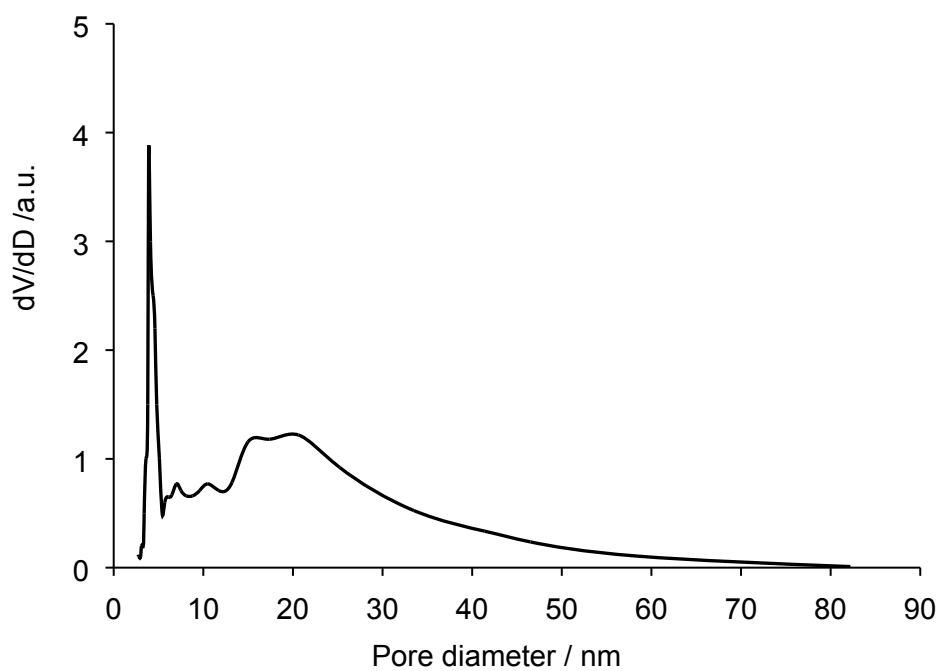

(b)

Figure S2 Nitrogen adsorption –desorption isotherm (a) and differential pore volume distribution (b) for the solid CoMoS-750. Sharp peak at ca 3.8 nm is a well-known BJH artifact, caused by instability of liquid nitrogen meniscus at  $P/P_0$  in the range 0.4-0.5.
